# Supplementary material for: Identification of primordial germ cell-like cells as liver metastasis initiating cells in mouse tumour models
Source: PubMed Central journal article supplement (PMC7090051; doi:10.1038/s41421-020-0145-3), 2020-03-24
Supplement: 41421_2020_145_MOESM1_ESM.pdf [file 41421_2020_145_MOESM1_ESM.pdf]

## Supplementary Information

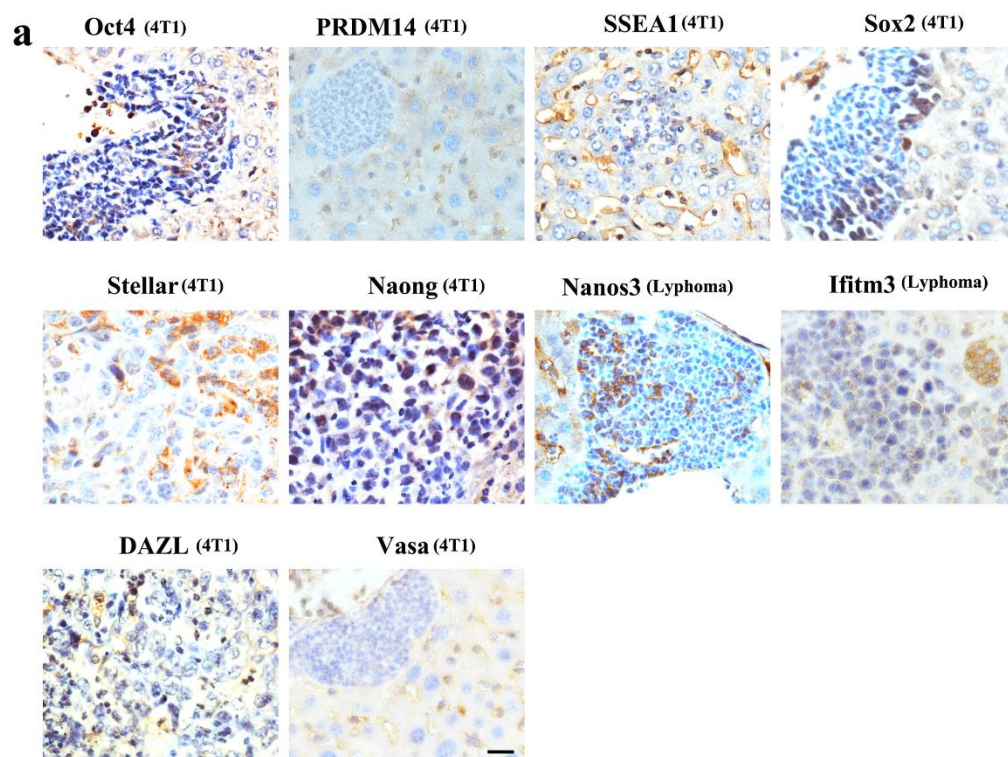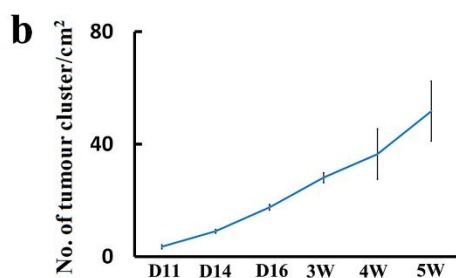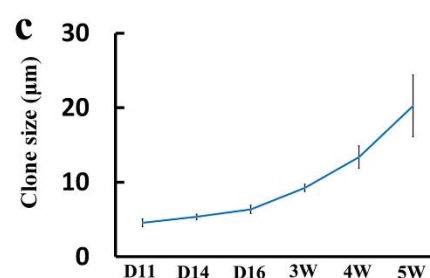

**Supplementary Fig. S1. Traits of liver metastasis.** (a) The differentiated somatic tumour cells in liver of the mice inoculated with lymphoma or 4T1 cells showed low level of the expression of PGC-related markers. (b) The plot shows the density of 4T1 tumour cells in liver at different time points. (c) The plot shows the changes of 4T1 tumour clone size in liver metastases at different time points. Scale bar=50µm.

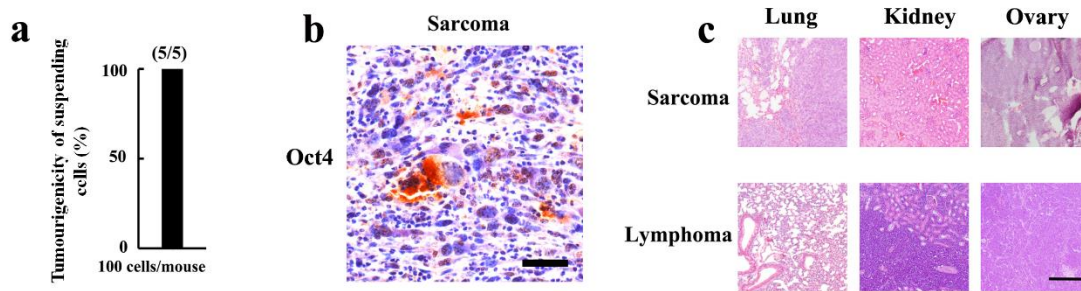

**Supplementary Fig. S2. PGC-like cells colonize to liver.** (a) The plot shows the tumorigenicity of suspended 4T1 cells (100 cells/mouse) subcutaneously injected into nude mice. (b) Sarcoma tumour sections from  $p53^{-/-}$  mice were stained with Oct4 antibody. (c) Histological analysis of various tissues from the mice inoculated with sarcomas or lymphomas tumour cells from  $p53^{-/-}$  mice 15 days after the tail vein injection.  $**p < 0.01$ . Scale bar = 100  $\mu\text{m}$  (b), 200  $\mu\text{m}$  (c).

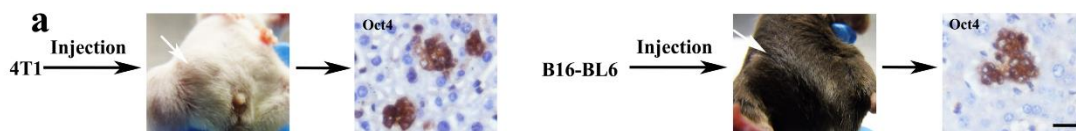

**Supplementary Fig. S3. The ability of PGC-like tumour cells to overcome the physical and biological hurdles.** (a) PGC-like tumour cells survived in mouse liver with normal immune system. Scale bar = 50  $\mu\text{m}$ .

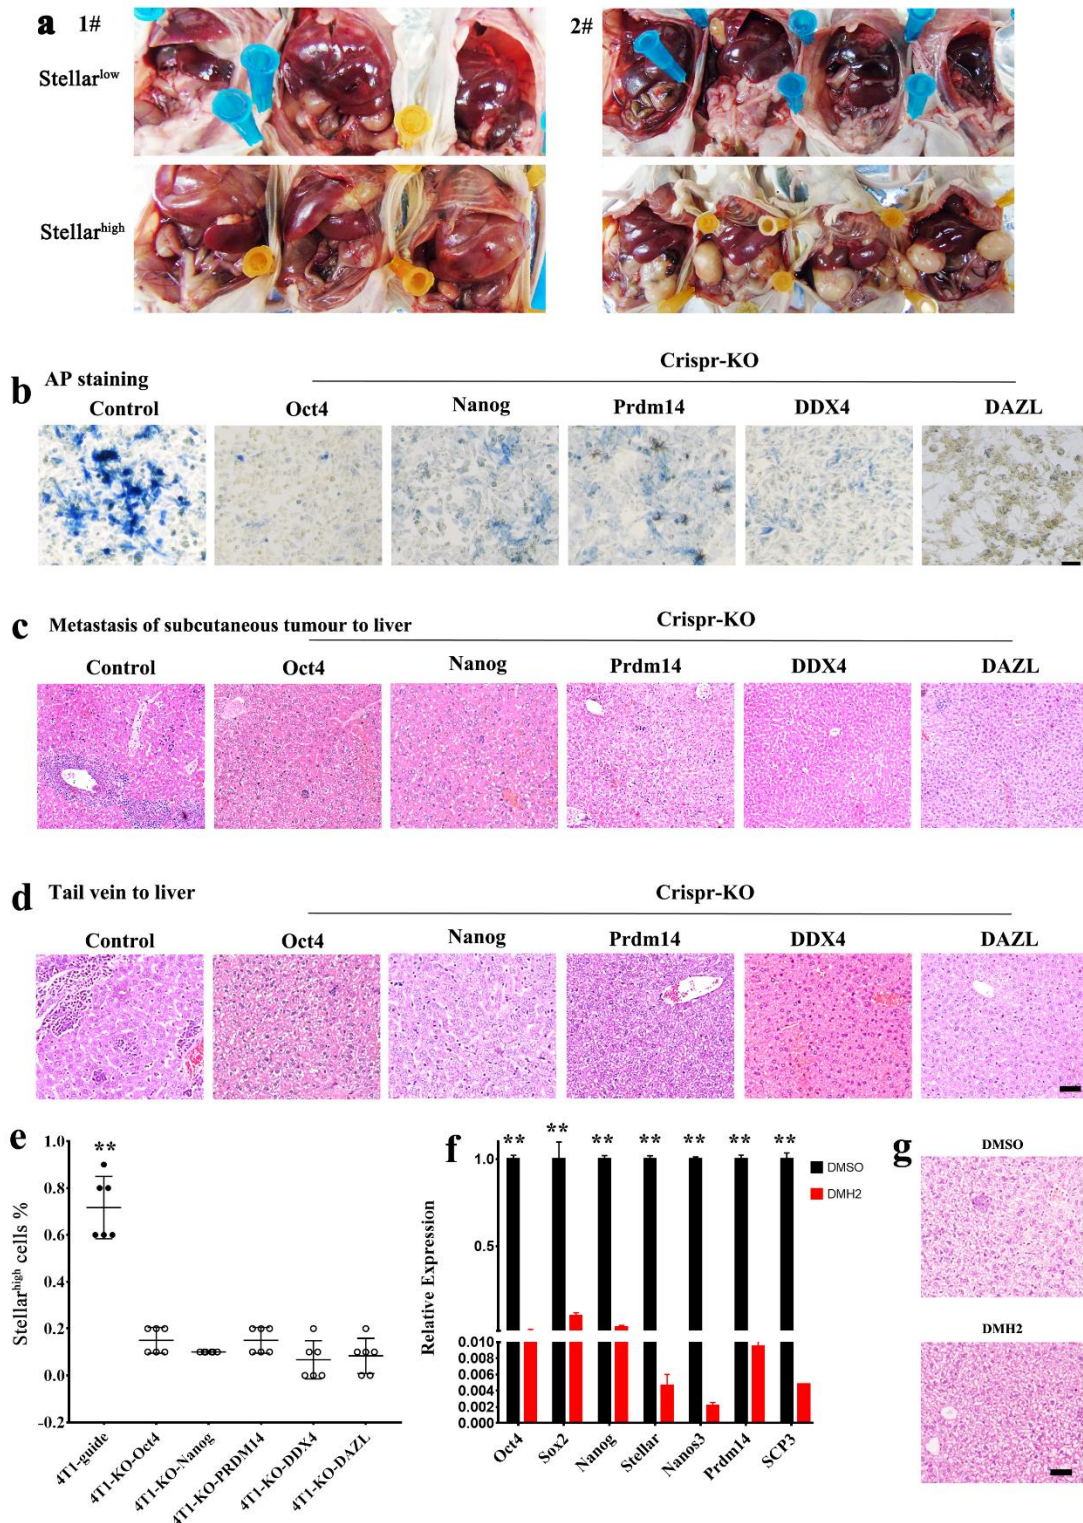

**Supplementary Fig. S4. Genetic deletion of the genes critical for PGC development represses the formation of PGC-like cells and liver metastasis.** (a) The images of various tissues from the mice inoculated with Stellar<sup>low</sup> and Stellar<sup>high</sup> tumour cells sorted from two different lymphomas of *p53*<sup>-/-</sup> mice through the tail vein injection (arrow showed the ovary tumours). (b) AP staining of 4T1 cells with control and

knockout in diverse PGC-related genes. (c) Histological analysis of liver tissues from the mice subcutaneously injected with 4T1 cells with control and knockout in diverse PGC-related genes 25 days after injection. (d) Histological analysis of liver tissues from the mice inoculated with 4T1 cells with control and knockout in diverse PGC-related genes 15 days after the tail vein injection. (e) Stellar<sup>high</sup> tumour cells were determined by FCS in 4T1 cells with control and knockout in diverse PGC-related genes. (f) The real-time PCR analysis of the expression of PGC-related genes in 4T1 cells treated with DMSO or DMH2 (6  $\mu$ M) for 3 days. (g) Histological analysis of the liver tissues of the mice injected with 4T1 cells treated with DMSO or DMH2 (6  $\mu$ M) for 3 days after 6 days of the tail vein injection. \*\*p<0.01. Scale bar= 50  $\mu$ m.

**Supplementary Table S1.** Sequencing data of CRIPSR-Cas9 knockout 4T1 cells.

| Gene      | Knock out DAN with CRISPR-Cas9                                                                                                                                                                                                                                                                                                                                                                                                                                                            |  |
|-----------|-------------------------------------------------------------------------------------------------------------------------------------------------------------------------------------------------------------------------------------------------------------------------------------------------------------------------------------------------------------------------------------------------------------------------------------------------------------------------------------------|--|
| Oct4-1#   | <p>Query 74 GAGGATCACCTTGGGGTACACCCAGGCCGAC---CGCGCCGCCGGGCTGTTGTTGG 129</p> <p>     </p> <p>Sbjct 35509165 GAGGATCACCTTGGGGTACACCCAGGCCGAC<b>GTGGGG</b>CTCACCTGGGCGTTCTCTTTGG 35509224</p> <p>sgRNA: GTACACCCAGGCCGACGTGGGG <b>Del:4bp</b></p>                                                                                                                                                                                                                                           |  |
| Oct4-2#   | <p>Query 62 CTGAAGCAGAAGAGGATCACCTTGGGGTACACCCAGGCCGAC<b>CGTGGGG</b>CTCACCTGGG 121</p> <p>     </p> <p>Sbjct 35509154 CTGAAGCAGAAGAGGATCACCTTGGGGTACACCCAGGCCGAC<b>GTGGGG</b>CTCACCTGGG 35509212</p> <p>sgRNA:GTACACCCAGGCCGACGTGGGG <b>Int:1bp</b></p>                                                                                                                                                                                                                                   |  |
| Nanog-1#  | <p>Query 240 AAGCAGAAGATGCGGACTGTGTTCTCACACGCCAGCTGTGTGCCCTC----- 287</p> <p>     </p> <p>Sbjct 122711672 AAGCAGAAGATGCGGACTGTGTTCTCTCAGGCCAG<b>CTGTGTGCACTCAAGGACAGGTTT</b> 122711731</p> <p>sgRNA: GCTGTGTGCA<b>CTCAAGGACAGG</b> <b>Del:37bp</b></p> <p>Query 288 ---AGCAG-----AGGCTCC-----AAATCTCATCCATTCCGACCCCG 322</p> <p>                                         </p> <p>Sbjct 122711732</p> <p><b>CAGAAGCAGAAGTACCTCAGCCTCCAGCAGATGCAAGA</b>ACTCTCCTCCATTCTGAACCTG 122711791</p> |  |
| Nanog-2#  | <p>Query 244 AAGATGC 250</p> <p>     </p> <p>Sbjct 122711678 AAGATGC 122711684 <b>Del:86bp</b></p> <p>sgRNA: GCTGTGTGCACTCAAGGACAGG</p> <p>Query 1 AAGAACTCTCCTCCATTCTGAACCTGAGCTATAAGCAGGTGGGGTCTTAAAAGTTGCT- 59</p> <p>     </p> <p>Sbjct 122711766 AAGAACTCTCCTCCATTCTGAACCTGAGCTATAAGCAGGTGGGGTCTTAGAAGTTGCTG 122711825</p>                                                                                                                                                           |  |
| Prdm14-1# | <p>Query 61 GTAGAGTGGTCAACGCCCGCGATGTAGAGGAAGTACAGTGTACTATCTCTCGGTGGTGG 120</p> <p>     </p> <p>Sbjct 13124421 GTAGAGTGGTCAATGCCAGCGAAGTGAAGGCA-CACAG-GGAC-AACTCTCGGAT-GTGG</p> <p>sgRNA: GTCAATGCCAGCGAAGTGAAGG <b>Int: 4bp</b></p>                                                                                                                                                                                                                                                      |  |
| Prdm14-2# | <p>Query 662 TGGACCCTTTCGAG 675</p> <p>     </p> <p>Sbjct 13124435 TGGACCCTTTCGAG 13124422 <b>Del: 323bp</b></p> <p>sgRNA: GTCAATGCCAGCGAAGTGAAGG</p> <p>Query 1 GCATGCTACAGGAAAGAAAGACAAGTTTTAGACTTTCATGTTACTT 46</p>                                                                                                                                                                                                                                                                    |  |

|                 |       |                                                                                           |  |
|-----------------|-------|-------------------------------------------------------------------------------------------|--|
|                 |       |                                                                                           |  |
|                 | Sbjct | 13124098 GCATGCTACAGGAAAGAAAGACAAGTTTACACTTTCATGTTACTT 13124053                           |  |
| <b>DDX4-1#</b>  | Query | 243 ATTTTTCAGATATTGGCGAGTCTAGTAAAAAAGAGAACACATCTAC--GTGGGGGGTTT 300                       |  |
|                 |       |                                                                                           |  |
|                 | Sbjct | 112636055 ATTTTTCAGATATTGGCGAGTCTAGTAAAAAAGAGAACACATCTACA <b>ACTGGTGGCTTT</b> 112635996   |  |
|                 |       | sgRNA: AGAACACATCTACA <b>ACTGGTGG Del: 2bp</b>                                            |  |
| <b>DDX4-2#</b>  | Query | 251 ATATTGGCGAGTCTAGTAAAAAAGAGAACACATCTACA <b>ACT</b> -----TGAAGAGGAA 302                 |  |
|                 |       |                                                                                           |  |
|                 | Sbjct | 112636045 ATATTGGCGAGTCTAGTAAAAAAGAGAACACATCTACA <b>ACTGGTGGCTTT</b> TGAAGAGGAA 112635986 |  |
|                 |       | sgRNA: AGAACACATCTACA <b>ACTGGTGG Del: 8bp</b>                                            |  |
| <b>DAZL-1#</b>  | Query | 309 TCATGCCAAACACCGTTTTTGT----AGAATAGATGTATGTCAATCGAATTTATATTTAA 364                      |  |
|                 |       |                                                                                           |  |
|                 | Sbjct | 50289132 TCATGCCAAACACCGTTTTTGT <b>TGGAGGA</b> AATTGATGTTAGGTTATTGTATTCATATTTCA 50289073  |  |
|                 |       | sgRNA: CAAACACCGTTTTTGT <b>TGGAGG Del: 4bp</b>                                            |  |
| <b>DAZL-2#</b>  | Query | 310 ATGCCAAACACCGTTTTTGT <b>TGGAGGA</b> AATGATGTTAGGTTATTGTATTCATATTTTCATT 368            |  |
|                 |       |                                                                                           |  |
|                 | Sbjct | 50289130 ATGCCAAACACCGTTTTTGT <b>TGGAGGA</b> AATGATGTTAGGTTATTGTATTCATATTTTCATT 50289071  |  |
|                 |       | sgRNA: CAAACACCGTTTTTGT <b>TGGAGG Del: 1bp</b>                                            |  |
| <b>SMAD2-1#</b> | Query | 302 TAAAAAGTCTCTCCITTTTCCCTTGCTCCAAATAGGTCCTTGACGGCC----- 353                             |  |
|                 |       |                                                                                           |  |
|                 | Sbjct | 76287890 TAAAAAGTCTCTCCITTTTCCCTTGCTCCAAATAGG <b>TCTCTGATGGCCGCTCTCAG</b> 76287949        |  |
|                 |       | sgRNA: TCTCTGATGGCCGCTCTCAG <b>Del:19bp</b>                                               |  |
|                 | Query | 354 -----GAAAGGGTTGCCACATGTTATATATTGCCGGCTCTGGCGCTGGCCGGAC 402                            |  |
|                 |       |                                                                                           |  |
|                 | Sbjct | 76287950 <b>GTTTCACACCG</b> GAAAGGGTTGCCACATGTTATATATTGCCGGCTCTGGCGCTGGCCGGAC 76288009    |  |
| <b>SMAD2-2#</b> | Query | 491 AAGATGAAGTGTGTGTAATCCGTACCACTA-CAGAGAGTTGACACCCAGGTAAGAAAC 549                        |  |
|                 |       |                                                                                           |  |
|                 | Sbjct | 76288071 AAGATGAAGTGTGTGTAATCCGTACCACTA <b>CCAGAGAGTTGAGACCC</b> AGGTAAGAAAC 76288130     |  |
|                 |       | sgRNA: CCACTACAGAGAGTTGAGACC <b>Del:1bp</b>                                               |  |
